# Supplementary material for: On-line microchip electrophoresis-mediated preconcentration of cationic compounds utilizing cationic polyacrylamide gels fabricated by in situ photopolymerization
Source: Royal Society of Chemistry journal article supplement (doi:10.1039/c8an01159a), 2018-01-01
Supplement: c8an01159a1.pdf [file c8an01159a1.pdf]

## Supporting Information

### **On-line microchip electrophoresis-mediated preconcentration of cationic compounds utilizing cationic polyacrylamide gels fabricated by *in situ* photopolymerization**

Sachio Yamamoto <sup>a\*</sup>, Fuka Okada <sup>a</sup>, Mitsuhiro Kinoshita <sup>a,b</sup>, and Shigeo Suzuki <sup>a,b</sup>

a. Faculty of Pharmacy, Kindai University, 3-4-1 Kowakae, Higashi-osaka, Osaka, Japan.

b. Antiaging Center, Kindai University, 3-4-1 Kowakae, Higashi-osaka, Osaka, Japan

\*Corresponding Author Tel: +81-6-4307-4340; Fax: +81-6-6721-2353 E-mail address:

[yamamoto@phar.kindai.ac.jp](mailto:yamamoto@phar.kindai.ac.jp)

Fig. S1 Time course of the changes in the fluorescence intensity due to preconcentration of Rho 110 at the front of cationic polyacrylamide gel

Fig. S2 Preconcentration and electrophoretic separation of Rho 110-labeled high-mannose type glycans derived from bovine ribonuclease B utilizing 25 mM Tris phosphate buffer (pH 2.0) containing 0.5% HPC.

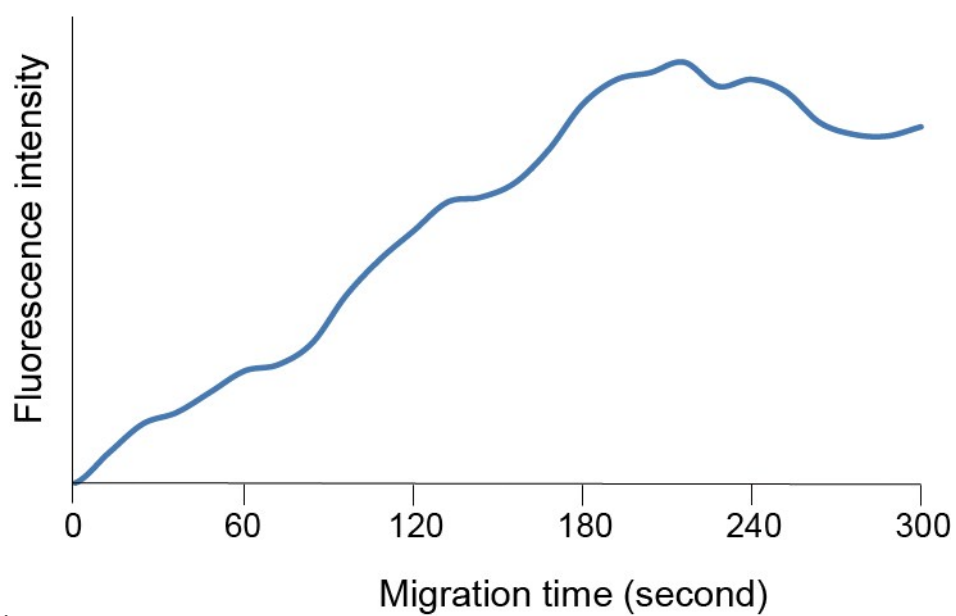

Fig. S1 Time course of the changes in the fluorescence intensity due to pre-concentration of Rho 110 at the front of cationic polyacrylamide gel. The pre-concentration conditions were the same as those described for Fig. 2

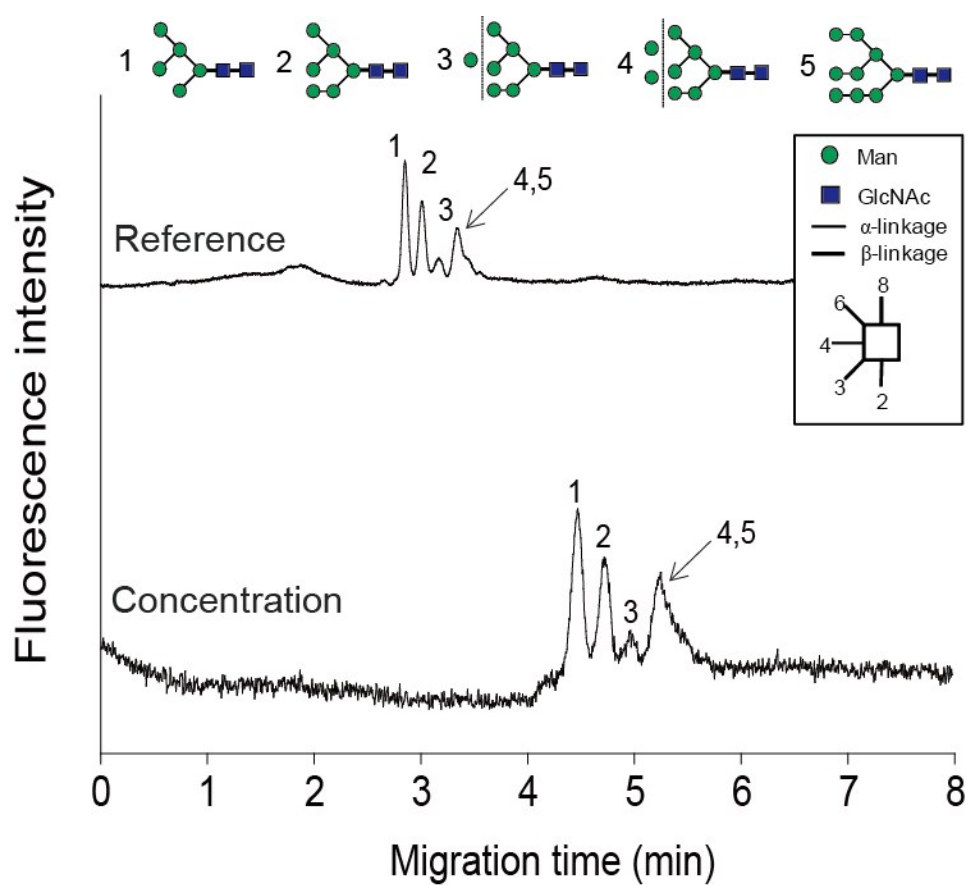

Fig. S2. Preconcentration and electrophoretic separation of Rho 110-labeled high-mannose type glycans derived from bovine ribonuclease B (lower trace) and the reference (upper trace) obtained by pinched injection. The analytical conditions were the same as those described for Fig. 5 except utilizing 25 mM Tris phosphate buffer (pH 2.0) containing 0.5% HPC.
